# Supplementary material for: Perilipin Isoforms and PGC-1α Are Regulated Differentially in Rat Heart during Pregnancy-Induced Physiological Cardiac Hypertrophy
Source: MDPI journal article supplement (doi:10.3390/medicina58101433), 2022-10-11

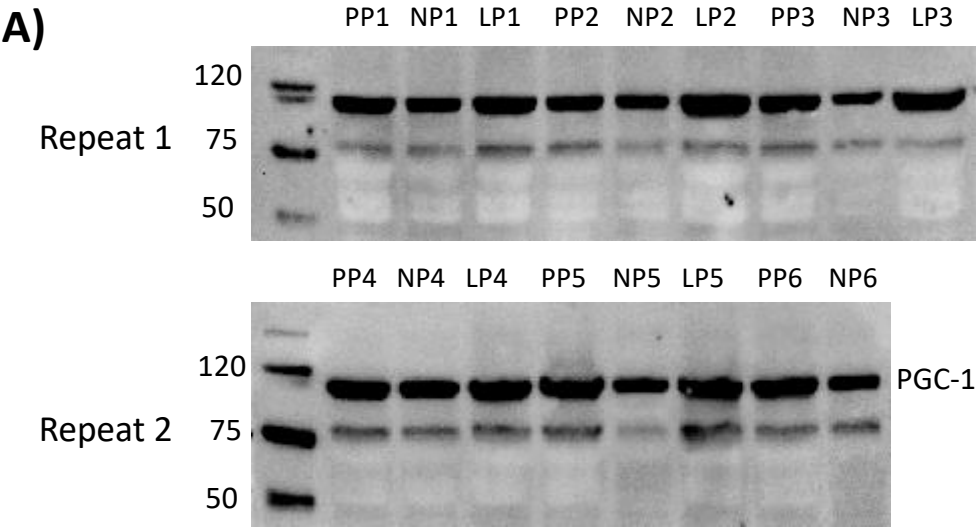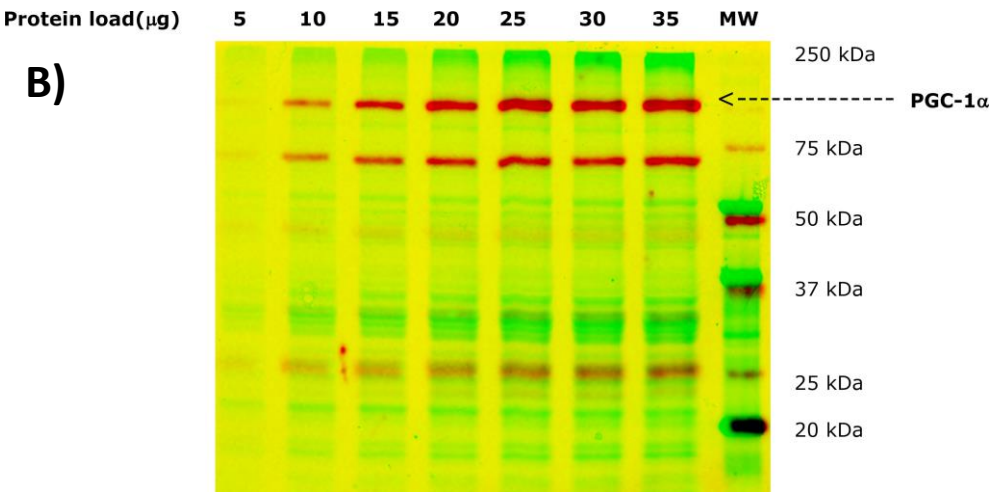

**Supplemental Figure S1. PGC-1α western blot normalization analysis.** **A.** Blot after cutting membrane at molecular weight 50 KDa, 75 KDa and 120 KDa for PGC-1α (91 KDa) **B.** Electrophoresis analysis in Stain-Free SDS with 5 to 35 μg of total protein load per lane. The stain-free total protein is represented in green and chemiluminescent blot image with fluorescent signal of the PGC-α antibody in red. **C.** Linear fit analysis of total protein load in the working range of 5 to 35 μg. **D.** Correlation analysis of the PGC-1α antibody fluorescent signal with sample concentration.

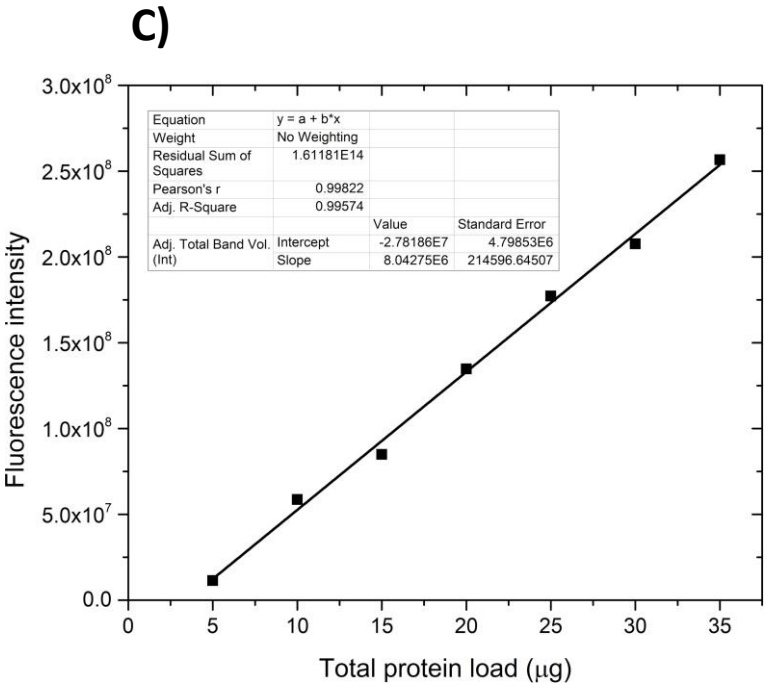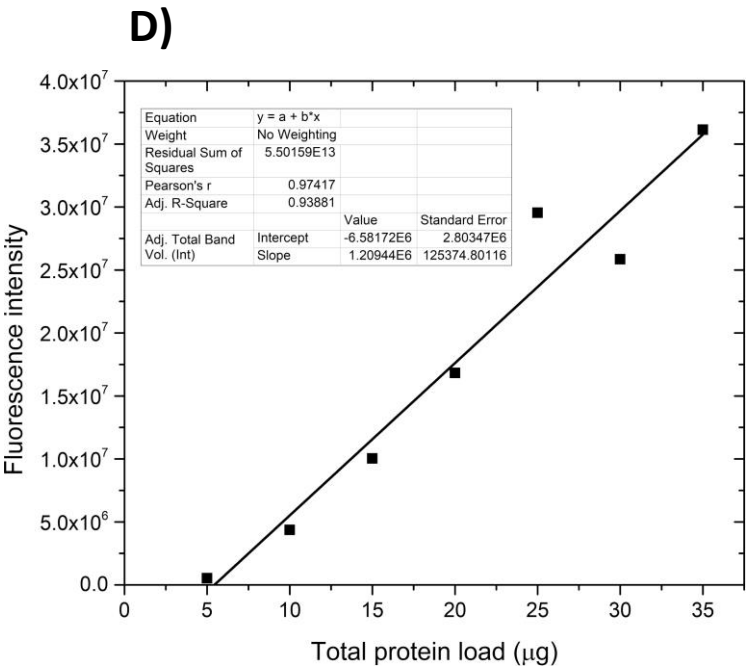

Supplement: s1 [file s1]
